# Supplementary material for: Variation and Genetic Structure in Platanus mexicana (Platanaceae) along Riparian Altitudinal Gradient
Source: MDPI journal article supplement (doi:10.3390/ijms16012066), 2015-01-19
Supplement: s1 [file s1]

## Sheet: Supplementary Information
Table S1. L, L', L'', ∆K values under the admixure model in P. mexicana population.
K	Ln P(D)		k	L (K)	L' (K)	L'' (K)	ΔK
2	-7114.9		2	-7112.23	-478.23	-271.75	594.563
2	-7116.3		3	-6634	-271.75	-169.5	370.85
2	-7080.7		4	-6362.25	-169.5	-133.69	292.501
2	-7090.8		5	-6192.75	-133.69	18.21	-39.8418
2	-7122.7		6	-6059.06	18.21	417.23	-912.86
2	-7098.7		7	-6077.27	417.23	178.91	-391.438
2	-7124		8	-6494.5	178.91	-365.4	799.461
2	-7125.3		9	-6673.41	-365.4	-6308.01	13801.3
2	-7109		10	-6308.01	-6308.01	0	0
2	-7139.9
3	-6628		SD	336.903	Medium	-737.111
3	-6641.8
3	-6645.1
3	-6654.1
3	-6638.6
3	-6652
3	-6631.6
3	-6616.1
3	-6630.9
3	-6601.8
4	-6368.1
4	-6348.4
4	-6385.2
4	-6347
4	-6369
4	-6361.3
4	-6362.6
4	-6360.4
4	-6360.1
4	-6360.4
5	-6180.8
5	-6187.8
5	-6188.8
5	-6196.2
5	-6180.7
5	-6194.9
5	-6202.5
5	-6228.6
5	-6175.6
5	-6191.6
6	-6050.9
6	-6044
6	-6054.7
6	-6029.9
6	-6040.8
6	-6052
6	-6032.5
6	-6045.9
6	-6032.8
6	-6207.1
7	-6264.5
7	-6066.8
7	-6075.3
7	-6054.1
7	-6047.1
7	-6061.9
7	-6062.9
7	-6067.7
7	-6036.4
7	-6036
8	-7126.7
8	-6064
8	-6762.1
8	-6023
8	-6049.3
8	-7583
8	-6013.6
8	-6669.7
8	-6521.4
8	-6132.2
9	-6753.1
9	-6920.7
9	-7651
9	-6844.6
9	-6530.4
9	-6258.2
9	-6041.1
9	-5998.9
9	-6826.8
9	-6909.3
10	-6055.6
10	-6957.6
10	-7130.5
10	-6167
10	-6031.3
10	-6308.6
10	-6282.8
10	-5957.6
10	-6058.7
10	-6130.4
